# Supplementary material for: Differential iridoid production as revealed by a diversity panel of 84 cultivated and wild blueberry species
Source: PLoS One. 2017 Jun 13;12(6):e0179417. doi: 10.1371/journal.pone.0179417 (PMC5469490; doi:10.1371/journal.pone.0179417)
Supplement: S1 Table — (XLSX) [file pone.0179417.s002.xlsx]

## Sheet: Sheet1
S1 Table. Complete member list of blueberry diversity panel (sampled in 2015).
a ND = not detected under these conditions.
b NM = not measured.
Sample	Cultivated/Wild	Location/Accession	Content of monotropein in fruitsa (ng/mg dry weight)	Content of monotropein in leavesab (ng/mg dry weight)
Aurora	cultivated	Grand Junction, MI	ND	NM
Beaufort	cultivated	Grand Junction, MI	2.779	NM
Berkeley	cultivated	Grand Junction, MI	3.01	NM
Bluechip	cultivated	Grand Junction, MI	2.664	NM
Bluecrop	cultivated	Grand Junction, MI	2.83	NM
Bluegold	cultivated	Grand Junction, MI	2.797	NM
Bluehaven	cultivated	Grand Junction, MI	46.7196	68.1554
Bluejay	cultivated	Grand Junction, MI	2.755	NM
Blueray	cultivated	Grand Junction, MI	2.582	NM
Blueridge	cultivated	Grand Junction, MI	41.7041	24.4557
Bluetta	cultivated	Grand Junction, MI	2.622	NM
Bounty	cultivated	Grand Junction, MI	2.703	NM
Brigitta	cultivated	Grand Junction, MI	3.343	NM
Cape Fear	cultivated	Grand Junction, MI	ND	NM
Cara's Choice	cultivated	Grand Junction, MI	3.605	NM
Caroline	cultivated	Grand Junction, MI	ND	NM
Carteret	cultivated	Grand Junction, MI	2.699	NM
Chandler	cultivated	Grand Junction, MI	2.661	NM
Chanticleer	cultivated	Grand Junction, MI	2.742	NM
Chippewa	cultivated	Grand Junction, MI	3.188	NM
Collins	cultivated	Grand Junction, MI	2.793	NM
Concord	cultivated	Grand Junction, MI	2.672	NM
Coville	cultivated	Grand Junction, MI	2.779	NM
Craven	cultivated	Grand Junction, MI	2.596	NM
Croatan	cultivated	Grand Junction, MI	2.61	NM
Darrow	cultivated	Grand Junction, MI	2.787	NM
Denise	cultivated	Grand Junction, MI	ND	NM
Draper	cultivated	Grand Junction, MI	2.915	NM
Duke	cultivated	Grand Junction, MI	ND	NM
Duplin	cultivated	Grand Junction, MI	ND	NM
Earliblue	cultivated	Grand Junction, MI	2.678	NM
Elizabeth	cultivated	Grand Junction, MI	ND	NM
Elliott	cultivated	Grand Junction, MI	2.664	NM
Friendship	cultivated	Grand Junction, MI	2.724	NM
Hannah's Choice	cultivated	Grand Junction, MI	2.723	NM
Hardyblue	cultivated	Grand Junction, MI	2.67	NM
Herbert	cultivated	Grand Junction, MI	2.687	NM
Huron	cultivated	Grand Junction, MI	ND	NM
Jersey	cultivated	Grand Junction, MI	ND	NM
Lateblue	cultivated	Grand Junction, MI	2.734	NM
Legacy	cultivated	Grand Junction, MI	ND	NM
Lenoir	cultivated	Grand Junction, MI	2.848	NM
Liberty	cultivated	Grand Junction, MI	2.789	NM
Meader	cultivated	Grand Junction, MI	ND	NM
Nelson	cultivated	Grand Junction, MI	2.669	NM
North Blue	cultivated	Grand Junction, MI	3.225	NM
North Country	cultivated	Grand Junction, MI	5.309	NM
North Sky	cultivated	Grand Junction, MI	2.619	NM
Northland	cultivated	Grand Junction, MI	2.864	NM
Nui	cultivated	Grand Junction, MI	2.73	NM
Olympia	cultivated	Grand Junction, MI	2.678	NM
Ornablue	cultivated	Grand Junction, MI	42.0181	24.288
Osorno (MSU 67)	cultivated	Grand Junction, MI	2.67	NM
Ozarkblue	cultivated	Grand Junction, MI	112.726	69.7322
Pamlico	cultivated	Grand Junction, MI	2.653	NM
Patriot	cultivated	Grand Junction, MI	2.678	NM
Pender	cultivated	Grand Junction, MI	2.787	NM
Polaris	cultivated	Grand Junction, MI	2.697	NM
Puru	cultivated	Grand Junction, MI	2.74	NM
Reka	cultivated	Grand Junction, MI	ND	NM
Rose	cultivated	Grand Junction, MI	2.671	NM
Rubel	cultivated	Grand Junction, MI	3.445	NM
Sampson	cultivated	Grand Junction, MI	2.678	NM
Sierra	cultivated	Grand Junction, MI	2.735	NM
Spartan	cultivated	Grand Junction, MI	2.812	NM
St. Cloud	cultivated	Grand Junction, MI	2.614	NM
Stanley	cultivated	Grand Junction, MI	2.623	NM
Summit	cultivated	Grand Junction, MI	197.734	70.6866
Superior	cultivated	Grand Junction, MI	2.714	NM
Sweetheart	cultivated	Grand Junction, MI	2.591	NM
Toro	cultivated	Grand Junction, MI	2.747	NM
V. floribundum	wild	USDA GRIN/PI 554930	2040.75	NM
V. calycinium	wild	USDA GRIN/PI 657261	542.327	NM
V. reticulatum Nene	wild	USDA GRIN/PI 666683	553.669	NM
V. reticulatum Red Button	wild	USDA GRIN/PI 666682	256.553	NM
V. elliottii	wild	USDA GRIN/PI 613650	23.2036	NM
V. ovatum	wild	USDA GRIN/PI 555177	166.163	NM
V. cylindraceum	wild	USDA GRIN/PI 618121	1387.41	NM
V. corymbodendron	wild	USDA GRIN/PI 618123	1466.93	NM
V. consanguineum	wild	USDA GRIN/PI 554736	1707.43	NM
V. padifolium	wild	USDA GRIN/PI 618126	648.046	NM
V. stamineum	wild	USDA GRIN/PI 618124	2371.14	NM
V. fuscatum	wild	USDA GRIN/PI 657192	20.2672	NM
V. arboreum	wild	USDA GRIN/PI 613651	1691.73	NM
