# Supplementary material for: Differential iridoid production as revealed by a diversity panel of 84 cultivated and wild blueberry species
Source: PLoS One. 2017 Jun 13;12(6):e0179417. doi: 10.1371/journal.pone.0179417 (PMC5469490; doi:10.1371/journal.pone.0179417)
Supplement: S3 Table — (XLSX) [file pone.0179417.s004.xlsx]

## Sheet: Sheet1
S3 Table. Monotropein concentration for tissue panel from subset of blueberry cultivars (sampled in 2016).
Cultivar	Tissue	Content of monotropein in tissue (ng/mg dry weight)
Concord	Young Leaves	2.51498
	Mature Leaves	2.58807
	Floral Buds	2.42624
	Stems	2.47445
	Unripe fruit	2.47893
	Ripe fruit	2.4352
Ornablue	Young Leaves	13.0638
	Mature Leaves	12.4263
	Floral Buds	229.342
	Stems	140.097
	Unripe fruit	41.4967
	Ripe fruit	33.4444
Bluecrop	Young Leaves	2.44486
	Mature Leaves	2.56586
	Floral Buds	2.49367
	Open Flowers	2.46288
	Stems	2.41435
	Unripe fruit	2.42438
	Ripe fruit	2.65217
Cara's Choice	Young Leaves	2.40857
	Mature Leaves	2.3741
	Floral Buds	2.53045
	Stems	2.44668
	Unripe fruit	2.6294
	Ripe fruit	2.39753
Ozarkblue	Young Leaves	48.7478
	Mature Leaves	42.3381
	Floral Buds	764.255
	Stems	229.009
	Unripe fruit	212.305
	Ripe fruit	101.151
Summit	Young Leaves	70.9165
	Mature Leaves	50.0486
	Floral Buds	1112.45
	Stems	225.106
	Unripe fruit	308.878
	Ripe fruit	231.725
